# Supplementary material
Source: publisher figshare collection journal article supplement (https://acs.figshare.com/ndownloader/files/5435087)
Supplement: Supplementary file 1 [file 5435087]

## Supporting Information

# Gaining further insight into the solvent additive-driven crystallization of bulk-heterojunction solar cells by in-situ x-ray scattering and optical reflectometry

*Felix Buss<sup>1</sup>, Benjamin Schmidt-Hansberg<sup>1</sup>, Monamie Sanyal<sup>2</sup>, Carmen Munuera<sup>3</sup>, Philip Scharfer<sup>1</sup>, Wilhelm Schabel<sup>1</sup>, Esther Barrena<sup>4,\*</sup>*

<sup>1</sup> Institute of Thermal Process Engineering, Thin Film Technology, Karlsruhe Institute of Technology (KIT), Kaiserstrasse 12, 76131 Karlsruhe, Germany

<sup>2</sup> Dept. Metastable and Low-Dimensional Materials, Max Planck Institute for Intelligent Systems, Stuttgart, Germany

<sup>3</sup> Instituto de Ciencia de Materiales de Madrid, CSIC, Madrid 28049, Spain

<sup>4</sup> Instituto de Ciencia de Materiales de Barcelona (ICMAB-CSIC), Campus UAB, Bellaterra 08193, Spain

**Corresponding Author:**

\* E-mail: [ebarrena@icmab.es](mailto:ebarrena@icmab.es)

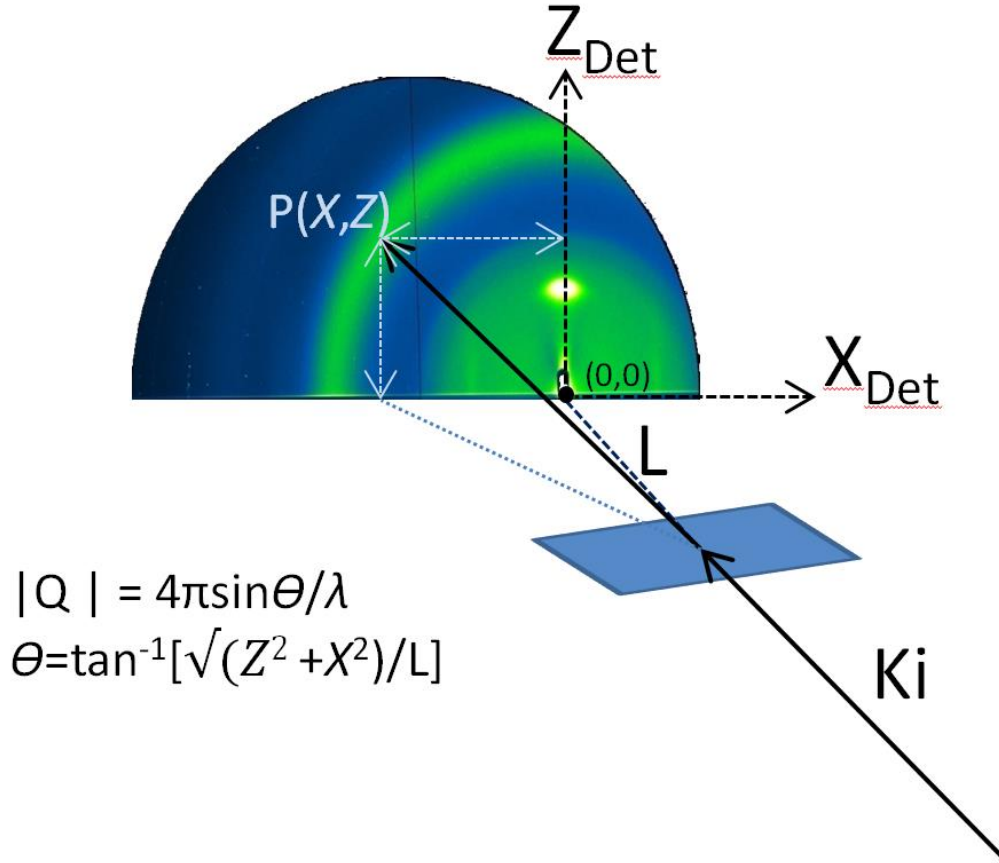

**Figure SI.1.** Scheme of the grazing incidence wide angle x-ray scattering (GIWAXS).  $X_{DET}$ ,  $Z_{DET}$  indicate the coordinates on the detector frame. The absolute value of the scattering vector,  $Q$ , is determined from the total scattering angle derived from the pixel position on the detector. Because in GIWAXS the Bragg specular condition is not met, a line scan along  $Z_{DET}$  do not correspond to a specular scan (i.e. that direction deviates from  $Q_Z$  in the sample reference frame). A 2D MARCCD camera was used with a diameter of 133 mm (2048 pixels). The sample-detector distance was 26.6 cm (calculated from detector scans, moving the detector vertically and horizontally).

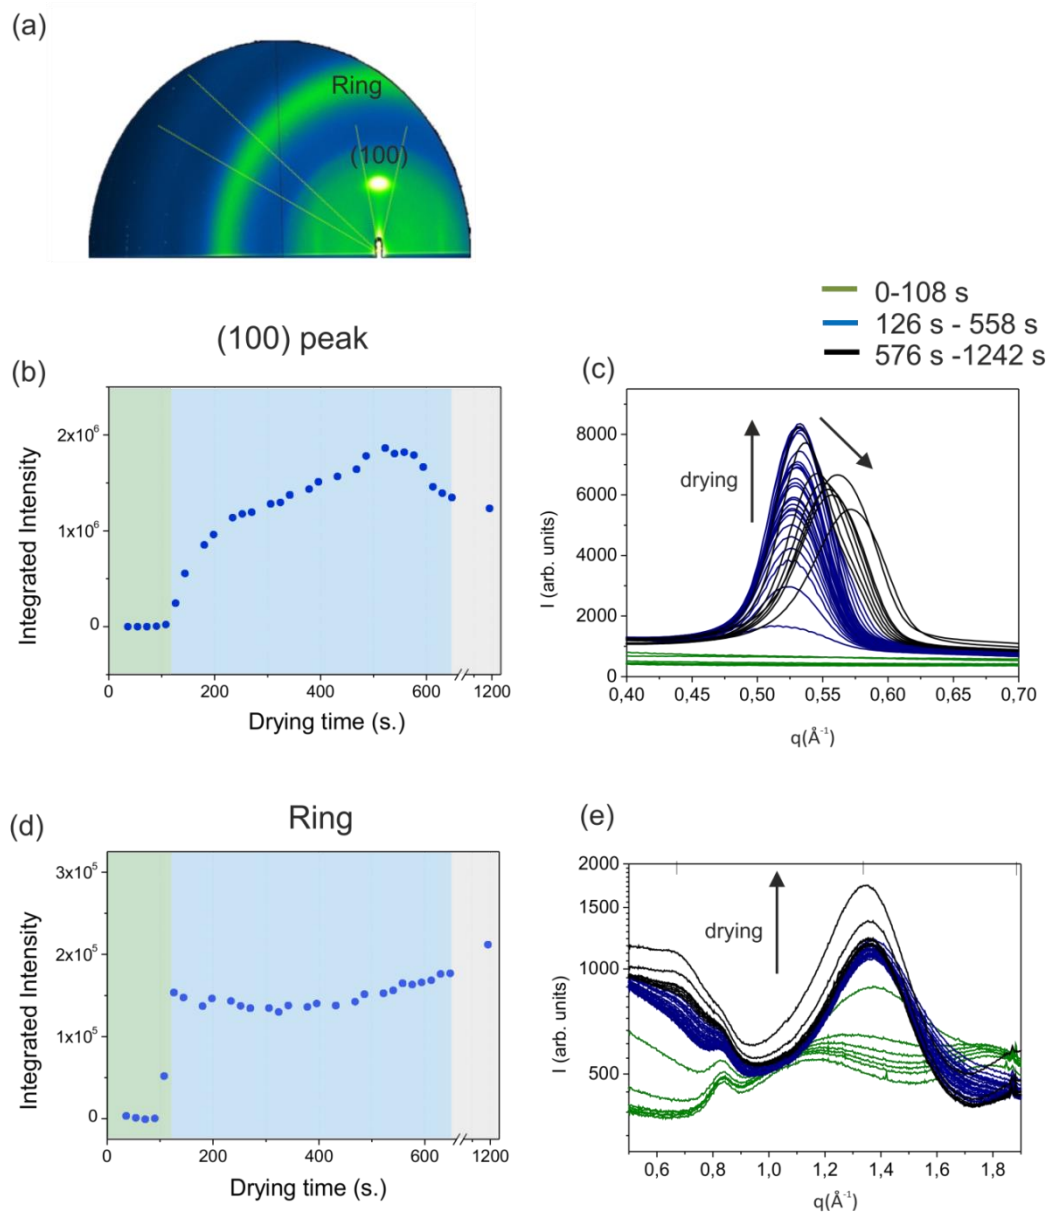

**Figure SI.2.** Time evolution of radial profiles for PCPDTBT:PC<sub>71</sub>BM cast from DCB/ODT over extended drying time. a) Illustration of the radial cuts used for 0° and 45° in part b and d. b), d) Continuation of integrated intensities in Fig3d over extended drying times. Polymer:Fullerene demixing due to PC<sub>71</sub>BM aggregation in part d at the late stages of drying is accompanied by a decrease in intensity for the polymer peak in part b. c) Shift of the (100) peak from  $q = 0.53 \text{ \AA}^{-1}$  to  $q = 0.575 \text{ \AA}^{-1}$  due to alkyl chain interspace reduction. e) Build up of a broad plateau from  $q = 0.5$ - $0.7 \text{ \AA}^{-1}$  and shift of amorphous polymer peak  $q = 1.37 \text{ \AA}^{-1}$  to  $q = 1.34 \text{ \AA}^{-1}$  due to PC<sub>71</sub>BM aggregation.

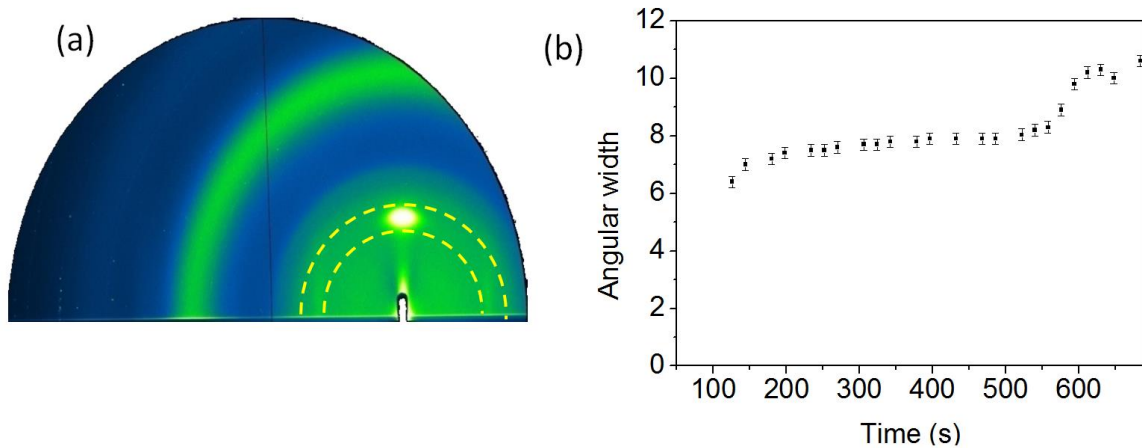

**Figure SI.3.** a) Scheme showing the angular width profile. b) The X-ray intensity was integrated between two concentric semi-circles in the 2D GIWAXS frames containing the (100) peak to account for the orientation distribution of PCPDTBT and plotted as a function of drying time.
